# Supplementary material for: The progression rate of spinocerebellar ataxia type 2 changes with stage of disease
Source: Orphanet J Rare Dis. 2018 Jan 25;13:20. doi: 10.1186/s13023-017-0725-y (PMC5785809; doi:10.1186/s13023-017-0725-y)
Supplement: Additional file 1: — Database on the Brazilian SCA2 cohort, by Monte et al 2018, Orphanet Journal of Rare Diseases. (XLSX 224 kb) [file 13023_2017_725_MOESM1_ESM.xlsx]

## Sheet: Brazilian SCA2 cohort at 2016
number id	visit (month)	family	visit (month)	Age at onset of the first symptom	Disease duration since the first symptom	AO gait ataxia	Disease duration since the start of gait ataxia	First symptom	NESSCAtotal	GaitNESSCA	LimbNESSCA	NistagmusNESSCA	OphtalmolplegiaNESSCA	PyramidalNESSCA	DysarthriaNESSCA	DysphagiaNESSCA	FasciculationsNESSCA	Sensory lossesNESSCA	DystoniaNESSCA	RigidityNESSCA	BradykinesiaNESSCA	Eyelid retractionNESSCA	BlepharospasmNESSCA	AmyotrophyNESSCA	Sphincter dysfunctionNESSCA	CrampsNESSCA	VertigoNESSCA	SARAtotal	GaitSARA	StanceSARA	SitSARA	SpeechSARA	ChaseSARA	Nose-fingSARA	DisdiaSARA	Heel-ShinSARA	9-HPT D	9-HPT ND	Click Test D	Click Test ND	8-MW 1	8-MW 2	PATA 1	PATA 2	BDI	resting tremor	ATXN1s (CAG repeats short allele)	ATXN1l (CAG repeat at large allele)	ATXN2s (CAG repeats at normal allele)
1	0	1	0	22	5	22	5	gait ataxia	14	2	3	0	0	0	1	1	0	3	0	0	1	0	0	0	2	1	0	20	3	3	1	3	2	3	2	3	27.8	33.2	24.5	27.2	8.2	9.7	16	19	1	1	29	30	22
1	12	1	13	22	6	22	6	gait ataxia	14	2	2	0	0	0	1	1	2	3	1	0	1	0	0	0	0	1	0	21.5	4	3	2	3	1.5	2.5	3	2.5	33.87	45.78	29.02	34.23	13.23	13.53	16	15	1	1	29	30	22
2	0	1	0	8	17	12	13	dysgraphia	13	3	2	0	0	0	1	1	1	0	3	0	1	0	0	1	0	1	0	24	7	3	2	3	1	2	3	3	36	78	41	45	1800	1800	13	11	9	1	28	29	22
2	12	1	14	8	18	12	14	dysgraphia	16	3	2	0	0	0	1	1	0	2	2	1	1	0	0	1	0	1	1	29	6	5	2	3	3	3	3	4	68.55	1500	66.49	56.67	1800	1800	9	10	6	1	28	29	22
3	0	1	0	44	12	44	12	gait ataxia	12	3	3	0	1	0	1	0	1	1	1	0	1	0	0	0	0	0	0	21	5	3	2	2	2	2	2	3	42	56	28	35	11.6	16.58	17	20	15	1	29	31	22
3	12	1	11	44	13	44	13	gait ataxia	14	2	3	0	1	0	2	1	1	2	1	0	1	0	0	0	0	0	0	19.5	5	3	2	3	1.5	2	1	2	30.98	66	31.9	34.39	11.1	13.35	14	14	21	1	29	31	22
4	0	1	0	35	26	35	26	gait ataxia	17	3	3	0	0	3	2	1	0	3	0	0	1	0	0	0	1	0	0	25	7	6	1	4	1	1	3	2	37.3	38.6	36.9	39	1800	1800	14	14	15	0	29	31	22
4	12	1	12	35	27	35	27	gait ataxia	17	3	2	0	0	3	2	1	0	3	1	0	1	0	0	0	1	0	0	25.5	7	6	2	3	1.5	1.5	3	1.5	40.81	46.68	46.58	41.9	1800	1800	16	14	9	0	29	31	22
5	0	1	0	40	19	40	19	gait ataxia	14	2	2	0	1	0	2	1	0	3	0	0	1	0	0	0	1	1	0	14	3	2	2	3	1	1	1	1	21	23	28	27	16	13	23	24	6	1	29	31	22
5	12		17	40	20	40		gait ataxia	16	2	3	0	1	0	2	1	0	3	1	0	1	0	0	0	1	1	0	20	5	3	2	4	1	1	1	3	26.3	26.7	37	32.5	12	11.9	19	17	5	1
6	0	1	0	35	16	35	16	gait ataxia	14	2	2	0	1	0	1	1	1	3	1	0	1	0	0	0	0	1	0	12	3	2	1	2	1	1	1	1	24	23	19	20	6	6	27	29	0	0	29	30	22
6	12	1	11	35	17	35	17	gait ataxia	15	2	2	0	1	1	1	1	1	3	1	0	1	0	0	0	0	1	0	13	3	2	1	2	1	1	1	2	20.97	19.03	22.15	20.39	6.36	5.62	24	26	0	0	29	30	22
8	0	1	0	37	21	37	21	gait ataxia	15	3	3	0	1	0	1	1	0	3	1	0	1	0	0	0	1	0	0	29	7	6	2	3	3	2	3	3	57	1500	38	40	1800	1800	16	20	36	0	29	29	23
8	12	1	13	37	22	37	22	gait ataxia	16	3	3	0	1	0	1	0	1	3	2	0	1	0	0	0	1	0	0	28.5	7	6	3	3	1.5	2.5	3	2.5	39.77	77.63	33.44	39.46	1800	1800	19	21	46	0	29	29	23
14	0	2	0	30	27	30	27	gait ataxia	18	4	1	1	1	0	1	1	1	3	0	0	1	1	0	0	2	1	0	18.5	8	4	1	2	1	0	1	1.5	31.8	31.9	38.9	31.5	1800	1800	19	20	19	0	29	30	22
14	12	2	13	30	28	30	28	gait ataxia	18	3	1	1	0	2	2	1	1	2	1	0	1	0	1	0	2	0	0	24.5	7	5	2	3	2	1	1.5	3	35.13	27.23	27.46	29.94	1800	180	17	18	13	0	29	30	22
15	0	2	0	53	15	58	10	torticollis	13	2	2	1	0	0	1	1	1	3	0	0	1	0	0	0	0	1	0	10.5	2	2	0	1	1.5	1	1	2	16.42	20.97	20.39	19.18	9.27	7.51	21	21	11	0	29	30	22
15	12	2	13	53	16	58	11	torticollis	15	2	2	1	1	0	1	1	0	2	1	0	1	0	0	0	2	1	0	13	2	2	0	2	1.5	2	2	1.5	24.5	19.56	22.24	21.25	7.46	7	21	23	20	0	29	30	22
19	0	2	0	36	18	36	18	gait ataxia	14	2	2	1	1	0	1	1	1	1	1	0	1	0	0	0	1	1	0	13	3	1	0	2	2	2	2	1	23	20	21	23	7	7	18	22	8	0	29	30	22
19	12	2	12	36	19	36	19	gait ataxia	18	2	2	1	0	0	2	2	2	2	1	0	1	0	0	0	2	1	0	18	3	2	1	3	2	1	3	3	15	24.28	18.7	23	6.28	6.55	24	22	18	0	29	30	22
21	0	2	0	17	21	17	21	gait ataxia	16	3	3	0	2	0	1	1	1	2	1	1	1	0	0	0	0	0	0	20.5	6	2	1	2	2	2.5	2	3	29	36	38	38	43	43	18	16	0	0	29	30	22
21	12	2	12	17	22	17	22	gait ataxia	16	3	3	0	2	0	1	1	1	2	1	1	1	0	0	0	0	0	0	18.5	6	2	1	3	1	2	1.5	2										0	29	30	22
22	0	3	0	25	19	25	19	gait ataxia	17	4	3	0	1	0	2	0	1	3	0	1	1	0	0	0	0	1	0	33	8	5	4	4	2	4	3	3	1500	1500	92	69	1800	1800	7	7	4	0	29	29	22
22	12	3	12	25	20	25	20	gait ataxia	21	4	3	0	2	0	2	1	1	3	2	0	1	0	0	0	1	0	1	36	8	6	4	4	3	3	4	4	1500	1500	115.17	81.48	1800	1800	10	10	13	1	29	29	22
23	0	3	0	24	15	24	15	gait ataxia	18	3	2	0	2	0	2	1	1	2	2	1	1	0	0	0	0	1	0	32.5	7	5	4	4	2.5	3	3	4	62	60	33.39	37.63	1800	1800	13	13	12	0	28	30	22
23	12	3	12	24	16	24	16	gait ataxia	20	3	2	1	0	0	2	1	2	2	2	1	1	0	0	0	2	1	0	31	7	5	4	3	2	3	3	4	62.91	1500	45.53	57.63	1800	1800	14	13	12	1	28	30	22
24	0	4	0	22	17	22	17	gait ataxia	12	2	2	0	0	1	1	0	0	3	1	0	1	0	0	0	0	0	1	10	2	2	0	1	1	2	1.5	0.5	16.22	19.99	19.98	22.31	4	5.03	26	25	11	0	30	31	22
26	0	4	0	18	12	18	12	gait ataxia	18	3	3	0	1	0	2	1	1	3	1	0	1	0	0	0	1	1	0	28	6	6	2	3	2	3	3	3	86.37	80.56	43.85	51.59	1800	1800	11	12	13	1	22	29	22
26	12	4	18	18	13	18	13	gait ataxia	22	3	3	0	2	0	2	1	2	3	2	1	1	0	1	0	0	1	0	34	7	6	2	4	4	4	4	3	81.2	1500	62.38	68.61	1800	1800	11	10	31	1	22	29	22
27	0	5	0	40	13	40	13	gait ataxia	13	2	3	0	0	0	1	1	1	1	1	0	1	0	0	0	1	0	1	16.5	3	2	0	2	2	2.5	1.5	3.5	30.71	34.23	27.68	26.49	14.6	12.7	24	25	8	0	29	30	23
27	12	5	13	40	14	40	14	gait ataxia	13	3	3	0	0	0	2	0	2	1	1	0	1	0	0	0	0	0	0	21	5	2	2	3	2	2	2	3	31.44	25.11	24.7	26.06	10.43	9.2	25	25	9	0	29	30	23
28	0	5	0	57	3	57	3	tremor and gait ataxia	12	2	2	0	1	0	1	0	1	2	1	0	1	0	0	0	0	1	0	10	2	1	0	2	1	1	2	1	21	38	29	27	9	9	18	19	2	0	29	30	22
28	12	5	12	57	4	57	4	tremor and gait ataxia	12	2	1	0	1	0	1	0	1	3	1	0	1	0	0	0	0	1	0	12.5	3	2	1	2	1	1.5	1	1	18.76	33.11	25.13	25.47	7.9	7.19	19	19	3	0	29	30	22
29	0	6	0	30	7	34	3	dysphagia	14	2	3	1	0	0	1	1	0	1	1	0	0	0	0	0	2	1	1	8.5	2	1	0	1	1	0.5	2	1	16.58	16.69	17.58	21.08	5.62	5.76	23	28	8	0	29	29	22
29	12	6	13	30	8	34	4	dysphagia	11	2	2	1	0	0	1	0	0	0	1	0	0	0	0	0	2	1	1	9	2	2	0	1	1.5	0.5	2	1	15.55	19.85	18.1	19.97	6.03	5.54	20	24	8	0	29	29	22
30	0	6	0	39	14	39	14	gait ataxia	17	2	1	0	0	3	1	2	0	3	2	0	1	0	0	0	1	1	0	8.5	2	1	0	1	2	1.5	0.5	0.5	20.39	20.49	19.42	20.2	7.02	6.56	27	25	6	0	29	30	27
30	12	6	12	39	15	39	15	gait ataxia	19	2	2	1	0	2	1	2	2	3	1	0	0	0	0	0	2	1	0	11	2	2	0	1	2	1.5	1	1.5	23.44	25.1	20.27	20.67	7.2	6.01	24	23	7	0	29	30	27
32	0	7	0	35	16	35	16	gait ataxia	24	3	3	0	2	0	3	1	2	3	3	0	1	0	1	1	1	0	0	32	7	6	2	5	3	3	3	3	1500	1500	58	57	1800	1800	0	0			29	29	22
33	0	8	0	20	24	20	24	gait ataxia	12	2	2	0	0	1	1	0	1	2	1	0	1	0	0	0	0	1	0	13.5	2	3	0	2	2	2	1	1.5	59.32	56.58	26.15	32.53	7.63	7.24	15	12	13	1	30	30	22
33	12	8	12	20	25	20	25	gait ataxia	13	2	2	0	1	1	1	1	0	3	1	0	0	0	0	0	0	1	0	16.5	3	3	0	2	2	2	2	2.5	36.54	32.75	29.36	27.51	8.79	9.49	17	15	12	0	30	30	22
35	0	8	0	32	23	32	23	tremor and gaitataxia	18	2	3	0	1	2	1	1	1	2	1	0	1	0	0	0	2	1		12.5	5	1	0	2	1	1	1.5	1										0			22
36	0	9	0	35	10	35	10	gait ataxia	13	2	3	0	1	0	1	1	0	0	1	0	1	0	0	0	1	1	1	13.5	3	2	0	2	1	1	3	1.5	21	30.4	23.1	23	11.3	10	21	19	6	0	29.3889	31.3993	22
36	12	9	12	35	11	35	11	gait ataxia	17	2	2	1	1	0	2	0	1	3	1	0	1	1	0	0	1	1	0	14	3	3	0	3	1.5	0	1.5	2	20.2	31.7	27.3	21.3	10.01	9.59	17	17	10	0	29.3889	31.3993	22
38	0	10	0	27	13	27	13	gait ataxia	17	3	2	0	1	0	3	1	1	3	2	0	1	0	0	0	0	0	0	31	7	6	3	4	2.5	2.5	3	3	73.94	100.83	71.97	76.71	1800	1800	6	6	48	1	29	29	22
40	0	11	0	47	2	47	2	gait ataxia	3	0	1	0	0	0	0	0	0	0	1	0	0	0	0	0	0	1	0	4.5	0	2	0	0	1	0	1	0.5	11.44	17.87	12.75	13.6	4.2	3.33	30	29	3	0	29	31	22
40	12	11	12	47	3	47	3	gait ataxia	1	0	0	0	0	0	0	0	0	1	0	0	0	0	0	0	0	0	0	1.5	0	0	0	0	1	0	0	0.5	11.6	13.01	14.48	14.2	4.71	4.34	28	29	4	0	29	31	22
41	0	11	0	52	2	52	2	gait ataxia	3	1	1	0	0	0	0	0	0	0	0	0	1	0	0	0	0	0	0	4.5	1	0	0	0	0.5	0	2	1	13.32	13.48	17.14	17.89	4.2	4.22	23	22	4	0	29	30	22
41	12	11	11	52	3	52	3	gait ataxia	5	1	2	1	0	0	0	1	0	0	0	0	0	0	0	0	0	0	0	3.5	1	0	0	0	1	0.5	0.5	0.5	12.03	17.16	15.26	17.39	5.89	5.98	21	24	0	0	29	30	22
43	0	12	0	31	40	59	12	diplopia	20	3	3	1	1	4	1	1	0	1	1	0	1	0	0	1	1	1	0	14	5	2	0	3	1	0.5	2	0.5	33.72	38.89	24.77	37.21	25.92	23.85	8	7	10	0	26	29	23
43	12	12	10	31	41	59	13	diplopia	19	2	1	0	1	3	1	1	1	3	2	0	1	0	0	0	1	1	1	14	4	2	1	2	1	1	2	1	29	34	26	39.5	22.1	22.5	15	17	7	0	26	29	23
43	24	12	23	31	42	59	14	diplopia	22	3	2	1	1	2	1	1	1	3	2	1	1	0	0	0	1	1	1	14.5	5	2	1	2	1	1	1.5	1	20.32	26.77	22.7	24.55	24.21	22.58	9	11		0	26	29	23
44	0	13	0	39	5	39	5	gait ataxia	17	3	3	0	1	0	2	1	1	2	1	1	1	0	0	0	0	1	0	28	7	5	2	4	2	2	3	3	77	73	93	100	1800	1800	7	6	11	1	30	32	22
44	12	13	11	39	6	39	6	gait ataxia	23	3	2	0	1	0	3	2	1	3	1	1	1	1	0	0	2	1	1	29.5	6	5	2	5	2	2.5	3.5	3.5	1500	1500	1200	1200	1800	1800	5	8	49	1	30	32	22
48	0	14	0	16	8	16	8	gait ataxia	12	2	2	0	0	0	1	0	2	1	1	0	1	0	1	0	0	1	0	17.5	2	2	1	3	2	2.5	2	3	48.98	1500	30.38	38.36	6.99	5.4	19	15	7	0	28	28	22
48	12	14	13	16	9	16	9	gait ataxia	16	2	2	0	1	0	2	1	1	3	2	0	1	0	0	0	0	1	0	18.5	3	2	1	3	1.5	2.5	2.5	3	45.89	58.39	42.33	41.15	6.31	6.91	14	13	5	0	28	28	22
49	0	14	0	46	8			vertigo	14	3	2	0	0	0	1	1	1	3	0	0	1	0	0	0	0	1	1	13.5	5	2	1	2	1	1.5	0	1	15	17.2	17	30	10.5	11.2	20	23	3	0	28	29	22
49	12	14	13	46	9			vertigo	15	3	2	0	1	0	1	1	1	3	1	0	1	0	0	0	0	1	0	16	5	2	1	2	1	1.5	1.5	2	25.9	28.76	30	33.2	11.01	13	25	22	4	0
50	0	14	0	29	9	29	9	gait ataxia	9	2	2	0	0	0	1	0	1	1	1	0	1	0	0	0	0	0	0	13	3	1	0	3	2	1.5	1.5	1	26.29	32.21	25.16	24.21	8.54	8.22	23	23	9	0	26	30	23
50	12	14	13	29	10	29	10	gait ataxia	14	2	3	0	1	0	1	0	1	1	1	0	1	1	0	0	0	1	1	14.5	3	2	2	2	2	1	1.5	1	30.08	28.86	26.91	30.19	10.46	11.03	13	14	19	0	26	30	23
60	0	15	0	52	8	52	8	gait ataxia	17	3	2	0	1	0	1	1	1	3	1	0	1	1	0	0	0	1	1	18.5	6	2	2	3	1	1.5	1	2	25	32	29	35	17	16	20	20	32	1	30	31	22
60	12	15	12	52	9	52	9	gait ataxia	14	2	2	1	1	0	1	1	1	2	1	0	1	1	0	0	0	0	0	19	6	2	2	3	1.5	1.5	1	2	25	34.2	34.5	33.2	16	14	20	22	19	1	30	31	22
62	0	16	0	14	14	14	14	gait ataxia	17	3	3	0	2	0	1	1	1	2	2	0	1	0	0	0	0	1	0	27	6	5	2	3	2	3	3	3	1500	1500	1200	1200	1800	1800				0	29	29	23
63	0	17	0	19	10	17	10	gait ataxia	18	3	3	0	2	0	1	1	1	3	1	0	1	1	0	0	0	1	0	29	6	6	2	3	2	3	3	4	100	75	60	70	35	36	12	13	13	0	26	33	22
64	0	18	0	37	15	37	15	gait ataxia	16	3	2	0	1	0	2	0	1	3	0	0	1	1	0	0	1	1	0	21.5	7	3	1	2	1.5	1	3	3	37.92	37.63	26.62	30.27	14.69	14.72	16	17	8	0	33	33	23
65	0	18	0	40	15	40	15	gait ataxia	14	3	3	0	1	0	2	1	0	1	2	0	1	0	0	0	0	0	0	28	7	6	2	3	2	3	2	3	1500	60	37	58	1800	1800	11	13	0	1
66	0	19	0	17	11	17	11	gait ataxia	17	2	3	0	1	3	2	0	1	0	1	1	1	0	0	0	0	1	1	17.5	3	2	2	3	1.5	1.5	2	2.5	32.76	37.41	22.31	26.28	5.67	5.68	25	19	38	0	28	31	22
66	12	19	13	17	12	17	12	gait ataxia	16	2	3	0	1	0	2	0	1	2	1	0	1	0	0	0	1	1	1	19	3	2	2	3	2.5	2	3	1.5	33	42	26	24	9.8	10.25	23	23	35	1	28	31	22
67	0	20	0	28	21	28	21	gait ataxia	27	4	3	0	2	0	3	1	1	3	3	1	2	1	0	0	2	1	0	33	8	5	3	5	2	2	4	4	1500	1500	1200	1200	1800	1800	7	6		1	28	39	23
67	12	20	13	28	22	28	22	gait ataxia	27	4	3	0	2	0	3	2	1	3	2	2	2	1	0	0	2	0	0	38	7	6	4	5	4	4	4	4	1500	1500	1200	1200	1800	1800	4	6		1	28	39	23
69	0	21	0	37	9	37	9	gait ataxia	13	3	3	0	1	0	1	0	1	2	1	0	1	0	0	0	0	0	0	18.5	6	2	2	3	1	1	1.5	2	37	38	30	35	1800	1800	19	18	2	0	29	30	22
69	12	21	12	37	10	37	10	gait ataxia	14	3	3	0	1	0	1	0	1	2	1	0	1	0	0	0	0	1	0	15	3	3	2	2	1	1.5	1.5	1	32	54	37	46	11	11.55	17	15	1	1	29	30	22
71	0	22	0	44	8	44	8	gait ataxia	11	2	2	1	1	0	1	0	0	1	1	0	0	0	0	0	1	1	0	11.5	3	2	1	2	1.5	1	0.5	0.5	23.45	29.11	20.36	21.29	5.62	5.43	28	26	10	0	26	28	22
71	12	22	13	44	9	44	9	gait ataxia	11	2	2	0	1	0	1	0	1	1	1	0	1	0	0	0	0	1	0	12	3	2	1	1	2	2	0.5	0.5	20.42	29.56	20.14	24.96	6.8	6.13	27	27	8	0
72	0	23	0	14	18	14	18	gait ataxia	13	2	2	0	1	0	1	1	1	1	1	1	1	0	0	0	0	0	1	17	3	3	0	2	2	2	2.5	2.5	33.62	27.59	36.99	29.07	6.1	5.43	19	17	14	0	29	33	22
72	12	23	13	14	19	14	19	gait ataxia	18	3	3	0	2	0	1	1	1	1	1	1	1	1	0	1	0	0	1	19.5	4	3	1	2	2	2	3	2.5	37	31.2	34.2	28.8	19.7	14.9	19	18	11	0	29	33	22
73	0	23	0	29	2	29	2	gait ataxia	11	2	2	0	1	0	1	0	0	1	1	0	1	0	0	0	0	1	1			2	0	1	1	1	1		22	35	35	30	8.5	10	18	14	16	0	30	33	22
73	12	23	13	29	3	29	3	gait ataxia	11	2	2	0	0	0	0	2	0	0	0	0	1	0	0	0	2	1	1	9.5	2	2	0	1	1	1	1.5	1	16.69	23.96	22.27	24.96	7.45	7.05	19	17	19	0	30	33	22
74	0	23	0	35	10	35	10	gait ataxia	9	2	1	0	1	0	1	1	1	0	0	0	1	0	0	0	0	1	0	11	3	2	1	1	1	1	0	2	18	18	26.1	25.38	8.17	9.76	17	18	5	0	29	33	22
74	12	23	13	35	11	35	11	gait ataxia	15	2	2	0	1	2	1	1	0	3	0	0	1	0	0	0	0	1	1	17	3	4	1	2	2.5	1	1	2.5	17.53	22.61	28.53	27.83	12.86	13.86	14	14	22	0	29	33	22
75	0	24	0	49	16	45	16	gait ataxia	20	2	3	1	1	0	2	2	1	3	1	0	1	0	0	1	2	0	0	14.5	3	2	0	3	1	1.5	3	1	38.84	30.04	42.1	35.14	12.33	15.95	12	12	27	0	29	30	22
89	0	25	0	41	2	41	2	gait ataxia	9	1	1	0	1	0	1	1	1	1	0	0	0	0	0	0	0	1	1	5.5	1	0	0	1	1	1	0.5	1	18.39	20.52	19.23	20.69	10	8.11	18	22	4	0	26	27	22
89	12	25	13	41	3	42	3	gait ataxia	12	2	2	0	1	0	0	1	1	1	1	0	1	0	0	0	0	1	1	8	2	2	0	1	1	1	0.5	0.5	18.41	17.62	19.62	21.86	7.57	7.77	30	29	4	0	26	27	22
97	0	26	0	51	12	51	12	gait ataxia	12	2	2	0	0	0	1	0	0	3	1	0	1	1	0	0	0	1	0	14	3	2	0	2	1	1	2.5	2.5	24.71	25.25	26.46	32.13	4.58	5.62	19	19	13	0	30	31	22
97	12	26	13	51	13	51	13	gait ataxia	13	2	2	0	0	0	1	0	0	3	1	1	1	0	0	0	0	1	1	14.5	3	2	1	2	1	1	2	2.5	26.33	34.7	30.38	35.68	6.58	6.3	19	18	2	0
98	0	27	0	26	14	26	14	gait ataxia	15	3	3	0	1	0	2	1	1	2	1	0	1	0	0	0	0	0	0	23.5	6	3	0	4	2.5	3	2	3	36.77	45.34	65	62	1800	1800	23	22	5	0	28	29	22
98	12	27	13	26	15	26	15	gait ataxia	15	3	3	0	1	0	2	1	1	1	1	0	1	0	0	0	0	1	0	26.5	6	4	2	3	3	3	2.5	3	89.44	58.64	43.2	39.77	1800	1800	22	24	5	0	28	29	22
103	0	28	0	32	23	32	23	gait ataxia	14	3	3	0	0	0	2	1	0	1	1	1	1	0	0	0	0	1	0	28.5	7	5	2	4	2	3	2.5	3					1800	1800	17	19		0			22
104	0	28	0	20	5	20	5	gait ataxia	8	2	2	0	0	0	1	1	0	1	0	0	0	0	0	0	0	1	0	13.5	3	0	1	1	2	2	2	2.5									3	0			22
[truncated: 10 more columns]
